# Supplementary material
Source: publisher figshare collection journal article supplement (https://karger.figshare.com/ndownloader/files/17991446)
Supplement: Supplementary file 1 [file 17991446]

Supplementary Table 1. Log-likelihood statistics and model fit indices for latent class analysis of socio-economic background

| Model | LL | No.  par | χ² (df),  *p*-value | AIC | BIC | Adj. LMR-LRT *p*-value (H0: K classes; H1: K+1 classes) | BLRT  *p*-value (H0: K classes; H1: K+1 classes) |
| --- | --- | --- | --- | --- | --- | --- | --- |
| one-class | -28448.97 | 9 | 840.36 (28), <.01 | 56915.93 | 56972.99 | <.01 | <.01 |
| two-class | -10117.50 | 16 | 615.26 (20), <.01 | 20266.99 | 20368.30 | .02 | <.01 |
| three-class | -9910.13 | 25 | 383.67 (12), <.01 | 19870.27 | 20028.56 | .46 | <.01 |
| four-class | -9849.27 | 34 | 353.61 (4), <.01 | 19766.55 | 19981.82 | -- | -- |
| five-class | Not well identified | | | | | | |

Note: N = 3922, LL = Log-likelihood, No. par = number of parameters estimated, χ²= Pearson chi-square test of model fit; AIC = Akaike Information Criterion, BIC = Bayesian Information Criterion, Adj. LMR-LRT = Adjusted Lo-Mendell-Rubin Likelihood-Ratio-Test, BLRT = Bootstrap Likelihood-Ratio-Test
